# Supplementary material for: Realist synthesis protocol on the effectiveness of a rapid response system in managing mental state deterioration in acute hospital settings
Source: HighWire-hosted journal article supplement (doi:10.1136/bmjopen-2023-077597), 2024-01-01
Supplement: bmjopen-2023-077597supp001_data_supplement.pdf [file bmjopen-2023-077597supp001_data_supplement.pdf]

Appendix 1: Search Concepts

|                                                                                                                                                                                                                                                                                                                                                                                                                                                                                                                                                                                                                                          |
|------------------------------------------------------------------------------------------------------------------------------------------------------------------------------------------------------------------------------------------------------------------------------------------------------------------------------------------------------------------------------------------------------------------------------------------------------------------------------------------------------------------------------------------------------------------------------------------------------------------------------------------|
| <p><b>Mental State Deterioration</b></p> <p><b>Concept 1</b><br/>Aggression OR Violence OR Verbal hostility OR Workplace Violence OR Physical Abuse OR Verbal Abuse OR Harassment OR Verbal Aggression OR Absconding OR Self Harm OR Physical Restraint OR Restraint OR Antisocial Behavior OR Mental State Deterioration OR Clinical Aggression</p> <p><b>Concept 2</b><br/>Hospital OR Health Service OR Health Care Policy OR Health Care Personnel OR Nurse OR Nursing Staff</p> <p><b>Concept 3</b><br/>Risk Management OR Risk Assessment OR Assessment OR Training OR Education OR De-escalation OR Health Personnel Attitude</p> |
| <p><b>Medical Response Team</b></p> <p><b>Concept 1</b><br/>Medical Response Team OR Emergency Medical Teams OR Rapid Response Team OR Medical Emergency Team OR Medical Emergency Response Team OR Rapid Response System OR Medical Team Support OR Rapid Response Team Activation</p> <p><b>Concept 2</b><br/>General Hospitals OR Health Services Administration OR Hospitals OR Hospital Units Health Policy OR Health Personnel OR Health Policy</p>                                                                                                                                                                                |
